# Supplementary material for: Microglial P2Y12 Receptor Signaling Governs Epilepsy-Associated Neurogenesis via Bidirectional Regulation of Distinct Microglial Subpopulations
Source: Research Square preprint supplement (doi:10.21203/rs.3.rs-6558062/v1), 2025-05-16
Supplement: Supplementary file 1 [file 5feabe3f66206fc0fb91da14.docx]

**Supplement 1.**

| **Gene** | **Primer Sequence** | |
| --- | --- | --- |
| **Forward** | **Reverse** |
| *Aba1* | 5′-ATCAACAAGCAATTCCTCGATGA-3′ | 5′-CAGCATTCGCTTCAAGGACATA-3′ |
| *P2ry12* | 5′-CATTGACCGCTACCTGAAGACC-3′ | 5′-GCCTCCTGTTGGTGAGAATCATG-3′ |
| *H2-Eb1* | 5′-TCCAGTGGCTTTGGTCAGAGAC-3′ | 5′-CAGGTTCTCCTCCAGGTTGTAG-3′ |
| *CD74* | 5′-GCTGGATGAAGCAGTGGCTCTT-3′ | 5′-GATGTGGCTGACTTCTTCCTGG-3′ |
| *GAPDH* | 5′-TCCCTGAGCTGAACGGGAAG-3′ | 5′-GGAGGAGTGGGTGTCGCTGT-3′ |

**Supplement 2.**

| **Annotated cell type** | **Gene markers** | **Clusters** |
| --- | --- | --- |
| Endothelial | Pecam1, Cldn5, Flt1, Ctla2a | 0-3, 5, 11 |
| Neuron | Stmn3, Celf4, Bex2, Gap43 | 4, 10, 19, 21, 28, 30 |
| Microglia | Csf1r, C1qb, C1qa | 6, 8, 20 |
| T cell | Cd3e, Cd3g | 7, 23 |
| B cell | Cd79a, Ms4a1, Cd19 | 24 |
| Smooth muscle cell | Myh11, Acta2, Myl9, Tagln, Cnn1, Tpm1 | 9 |
| Choroid plexus epithelial cell | Slc22a17, Krt8 | 12, 27 |
| Astrocyte | Aqp4, Gja1, Epcam | 13 |
| Erythrocyte | Hba-a2, Hba-a1, Hbb-bt | 14 |
| Ependymal | Ccdc153, Enkur, Foxj1 | 25 |
| Oligodendrocyte | Mbp, Opalin, Olig1, Mog | 15 |
| Neutrophil | S100a8, S100a9, Csf3r | 16, 26 |
| DC | Irf8, Clec9a, Itgax | 17 |
| Pericyte | Kcnj8, Rgs5, Mcam | 18 |
| Fibroblasts | Dcn, Col1a1, Col1a2, dgfra | 22 |
| Mast | Ms4a2, Ptprc | 29 |

**Supplement 3.**

**
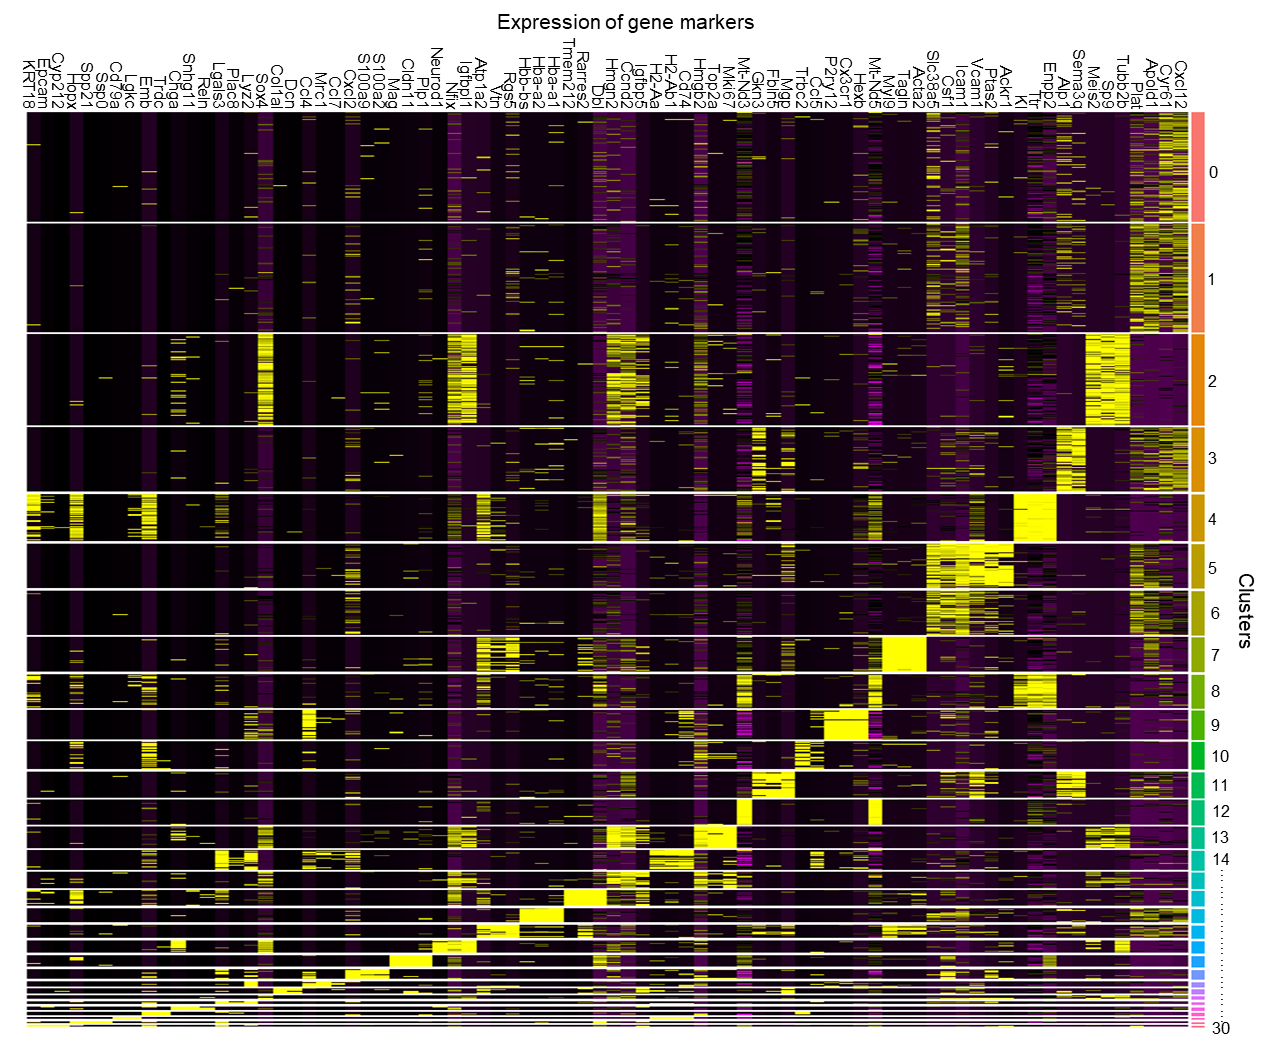
**

**Supplement 4.**

**
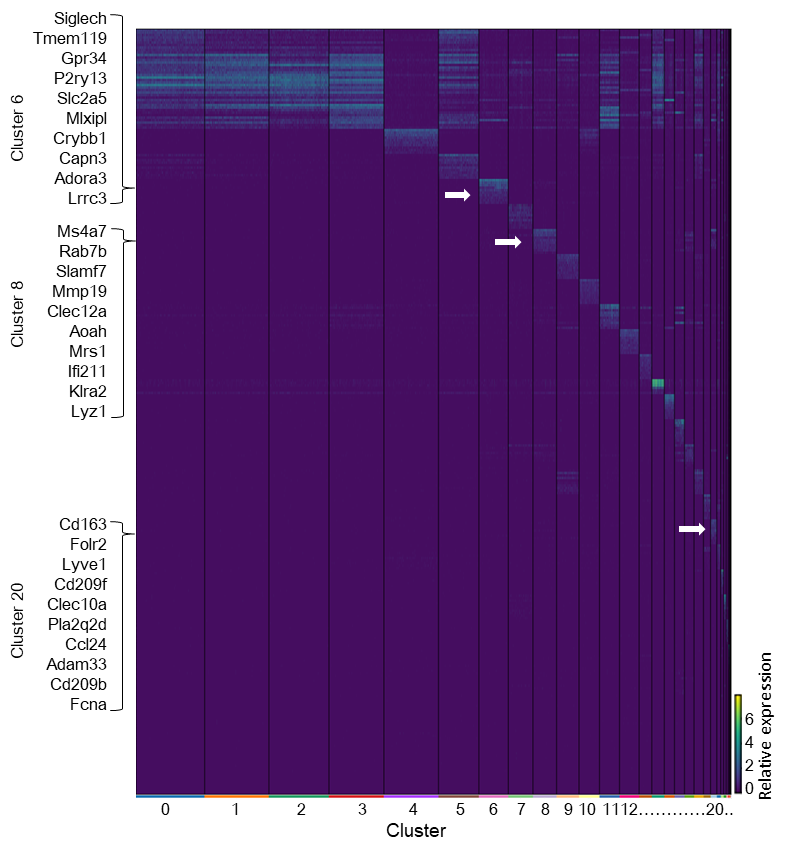
**

**Supplement 5.**

**
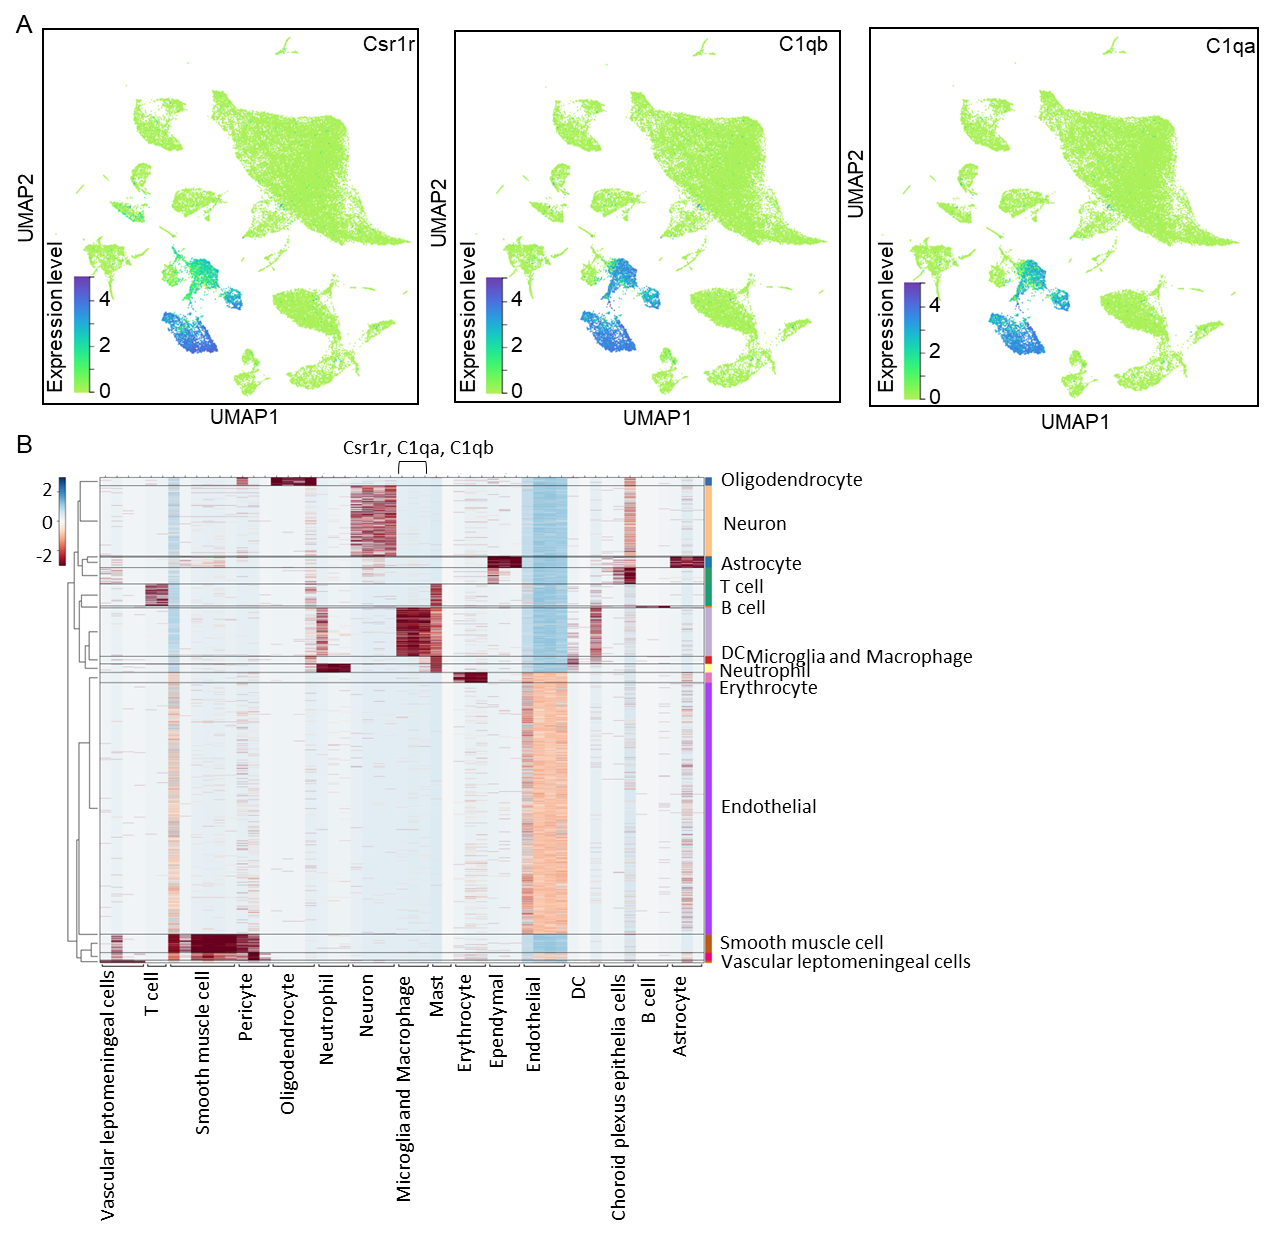
**

**Supplement 6.** E

**
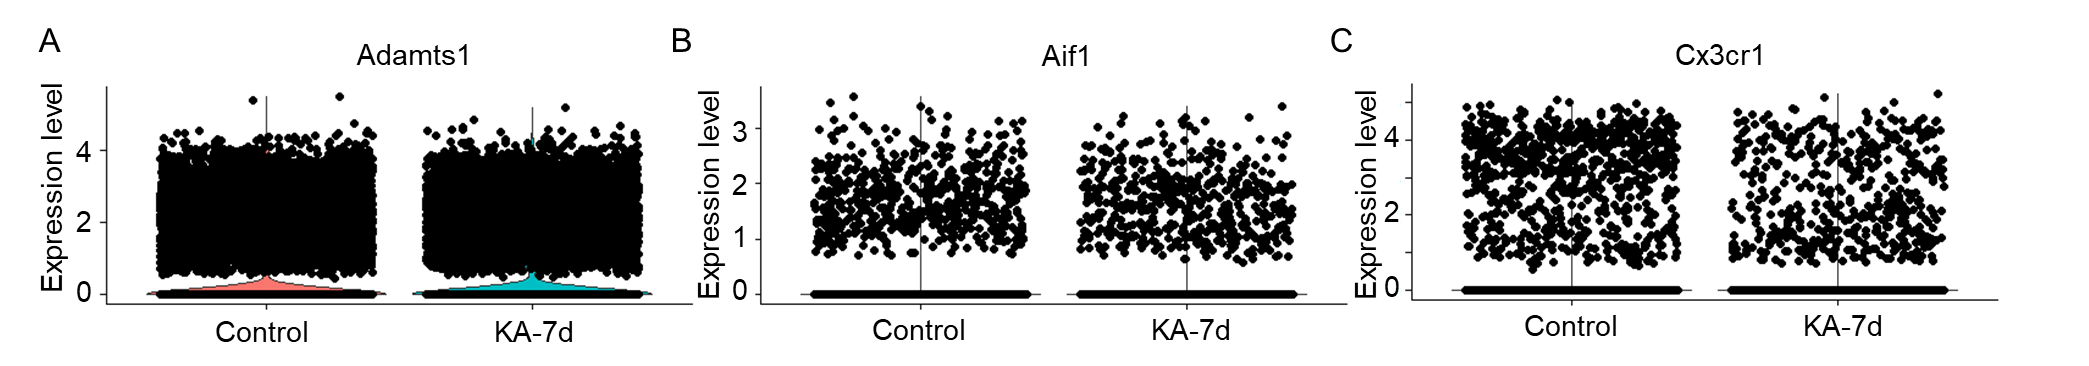
**

**
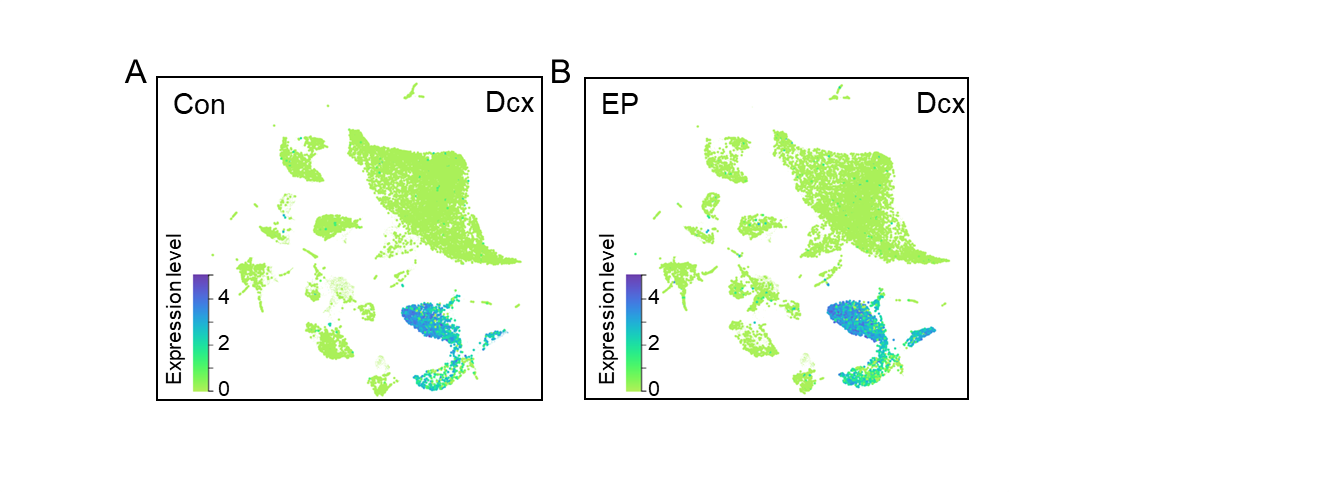
****Supplement 7.**

**Supplement 8.**

**
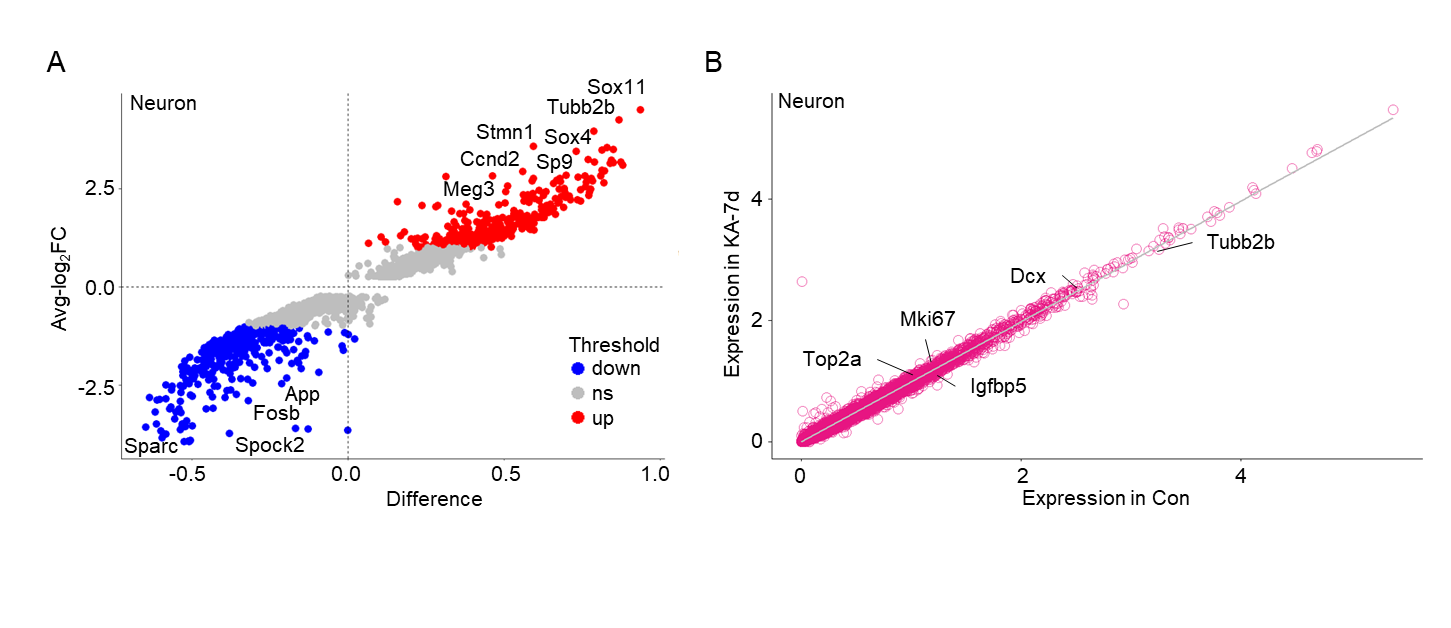
**
